# Supplementary material for: Value of preoperative 18F-FDG PET/CT and HRCT in predicting the differentiation degree of lung adenocarcinoma dominated by solid density
Source: PeerJ. 2023 Apr 28;11:e15242. doi: 10.7717/peerj.15242 (PMC10150717; doi:10.7717/peerj.15242)
Supplement: Data S1 [file peerj-11-15242-s001.txt]

## Sheet: 无标题2总共
	age	gender(Male=0,Female=1)	smoking(NO=0,YES=1)	location(LU=left upper,RL=right lower,RU=right upper,RM=right middle,RL=right lower)	nodule diameter	CT value(nodule mm)	lobulation（yes=1.no=0）	spiculation(yes=1,no=0)	pleural indentation(yes=1,no=0)	pleural contact(yes=1,no=0)	vascular convergence sign(yes=1,no=0)	air dilatation(yes=1,no=0)	disruption(yes=1,no=0)	distortion(yes=1,no=0)	well differentiation	moderate differentiation	poor differentiation	number	CEA	CA125	CA199	CA153	SCC	LDH	Pleural invasion	lymphonodus	SUVmax	SUVmean	MTV	TLG	AIS	MIA	LPA	APA	SPA	PPA	MPA	AIS	MIA	LPA	APA	SPA	MPA	PPA
one	sixty-five	0	0	LU	40.5	33	1	0	0	1	1	0	0	0	0	1	0	1	0	0	0	0	0	136	1	0	16.07	6.43	13.44	86.4192	0	0	0	50	20	0	30	0	0	0	1	0	0	0
two	sixty-four	0	0	RL	37	35	1	1	0	1	0	1	0	0	0	1	0	1	0	0	0	0	1	218	1	7	6.87	4.28	4.05	17.334	0	0	0	0	0	90	10	0	0	0	0	0	0	1
three	forty-eight	1	0	RU	25	37	1	1	0	1	0	1	1	1	0	1	0	1	0	0	0	0	0	151	1	0	10.9	7.94	8.16	64.7904	0	0	0	45	45	0	10	0	0	0	1	0	0	0
four	sixty-nine	0	0	LU	32	39.7	1	1	0	1	0	0	0	1	0	1	0	1	1	0	0	0	0	154	0	10	16	6.56	11.25	73.8	0	0	0	60	0	20	20	0	0	0	1	0	0	0
five	fifty-three	1	0	RM	24.8	39.2	1	1	0	1	1	0	0	0	0	0	1	1	1	1	0	0	0	207	1	0	16.03	10.08	0.51	5.1408	0	0	0	0	100	0	0	0	0	0	0	1	0	0
six	sixty-three	0	0	RL	14	20	1	0	0	0	1	0	0	0	0	1	0	1	1	0	0	0	0	165	0	0	2.38	1.84	0.62	1.1408	0	0	0	100	0	0	0	0	0	0	1	0	0	0
seven	fifty-five	0	0	LU	24	21	1	1	0	1	1	1	0	0	0	1	0	1	0	0	0	0	0	147	1	0	6.44	4.29	1.1	4.719	0	0	0	85	5	10	0	0	0	0	1	0	0	0
eight	thirty-nine	0	0	LL	31	31.2	1	1	1	1	1	0	0	0	0	1	0	1	0	0	0	0	0	139	0	0	9.18	6.95	2.58	17.931	0	0	0	50	10	30	10	0	0	0	1	0	0	0
nine	fifty-one	1	0	LU	20	34.8	1	1	0	1	1	0	0	1	0	1	0	1	0	0	0	0	0	168	1	0	11.83	7.08	1.64	11.6112	0	0	0	75	15	0	10	0	0	0	1	0	0	0
ten	sixty-two	1	0	LU	32	39.6	1	1	0	1	1	0	0	1	0	1	0	1	1	0	0	0	1	158	1	10，11，12	14.21	9.58	9.8	93.884	0	0	0	60	0	0	40	0	0	0	1	0	0	0
eleven	seventy-five	0	0	RL	32	32.9	1	1	1	1	1	0	1	1	0	1	0	1	0	0	0	0	0	231	0	0	15.67	9.79	5.49	53.7471	0	0	0	0	0	0	0	0	0	0	0	1	0	0
twelve	sixty-one	1	0	RL	29	32.9	0	0	0	1	1	0	0	0	0	1	0	1	0	0	0	0	0	164	0	0	5.08	3.46	4.14	14.3244	0	0	0	50	0	50	0	0	0	0	0	0	0	1
thirteen	sixty-seven	0	1	RU	12	35.5	1	1	0	1	0	0	0	1	0	0	1	1	1	0	0	1	0	232	0	0	6.62	4.28	1.25	5.35	0	0	0	35	40	0	25	0	0	0	0	1	0	0
fourteen	fifty-one	0	1	RU	42	31.1	1	1	0	1	1	1	0	1	0	0	1	1	1	1	1	0	0	186	0	7,11	13.49	8.65	16.86	145.839	0	0	0	0	0	0	0	0	0	0	0	1	0	0
fifteen	sixty-nine	0	0	LU	30.1	36	1	1	0	1	1	0	0	1	0	1	0	1	1	0	0	0	0	186	0	11	20.88	14.13	5.46	77.1498	0	0	0	80	20	0	0	0	0	0	1	0	0	0
sixteen	sixty-five	0	1	LU	53	36	1	1	1	1	1	1	0	0	0	0	1	1	1	0	0	0	0	149	1	0	16.87	9.79	17.48	171.129	0	0	0	40	60	0	0	0	0	0	0	1	0	0
seventeen	sixty-five	1	1	LU	21	27.5	1	0	0	1	1	0	0	1	0	1	0	1	0	0	0	0	0	223	0	5,6,10	11.96	7.96	5.92	47.1232	0	0	0	90	0	0	10	0	0	0	1	0	0	0
eighteen	sixty	1	1	LL	25.6	16.2	1	1	0	1	1	1	0	1	0	0	1	1	0	0	0	0	0	171	0	5,6,10,11	7.99	4.61	4.25	19.5925	0	0	0	40	20	0	40	0	0	0	0	0	1	0
nineteen	sixty-nine	0	1	RU	14.8	31.3	1	1	0	1	0	1	0	0	0	0	1	1	0	0	0	0	0	314	0	0	2.23	1.18	2.12	2.5016	0	0	0	0	0	0	0	0	0	0	0	1	0	0
twenty	sixty-three	0	1	RU	14.1	20.2	0	0	0	1	0	1	0	0	0	1	0	1	0	0	0	0	0	166	0	0	3.21	2.05	1.46	2.993	0	0	0	95	0	0	0	0	0	0	1	0	0	0
twenty-one	fifty-five	1	1	RM	11.6	23.1	1	1	0	1	0	0	0	0	0	1	0	1	0	0	0	0	0	133	0	0	3.81	2.6	0.95	2.47	0	0	0	0	0	0	0	0	0	0	0	1	0	0
twenty-two	fifty	1	0	RU	26.4	32.2	1	1	0	1	1	1	0	1	0	1	0	1	1	0	0	1	0	91	0	11	12.04	7.61	6.45	49.0845	0	0	0	80	20	0	0	0	0	0	1	0	0	0
twenty-three	sixty-nine	1	1	RL	20.1	37.5	1	1	0	1	1	1	0	0	0	1	0	1	0	0	0	0	0	196	0	0	4.01	2.6	1.31	3.406	0	0	0	45	0	50	5	0	0	0	0	0	0	1
twenty-four	fifty-five	1	1	LL	29.2	27.9	1	1	1	1	1	1	0	1	0	0	1	1	1	0	0	0	0	171	0	0	7.47	4.55	8.7	39.585	0	0	0	0	0	0	100	0	0	0	0	0	1	0
twenty-five	fifty-one	1	1	RU	31.3	29.4	1	1	0	1	1	1	0	0	0	0	1	1	1	0	0	1	0	146	1	2,4,7	17.2	11.43	7.15	81.7245	0	0	0	30	60	0	10	0	0	0	0	1	0	0
twenty-six	sixty-one	1	1	LL	21	19.7	1	1	0	1	0	0	0	0	0	1	0	1	0	0	0	0	0	123	0	0	4.26	2.81	2.05	5.7605	0	0	35	50	0	0	15	0	0	0	1	0	0	0
twenty-seven	sixty-six	1	0	RL	46	33.7	1	1	0	1	1	1	0	0	0	1	0	1	0	0	0	0	0	140	0	0	7.52	4.35	9.41	40.9335	0	0	0	80	20	0	0	0	0	0	1	0	0	0
twenty-eight	thirty-seven	0	0	LU	24.1	22.9	1	1	1	1	1	1	0	1	0	0	1	1	1	0	0	1	1	182	0	10	14.9	9.8	5.16	50.568	0	0	0	0	100	0	0	0	0	0	0	1	0	0
twenty-nine	sixty-five	0	1	LU	25	27.2	1	0	0	1	0	0	0	0	0	1	0	1	1	0	0	0	0	175	0	0	3.85	2.47	6.16	15.2152	0	0	0	70	0	0	30	0	0	0	1	0	0	0
thirty	sixty-five	0	1	LU	29.6	24	1	1	0	1	1	1	0	0	0	1	0	1	1	0	0	0	0	175	1	0	6.57	4.44	3.81	16.9164	0	0	0	20	0	50	30	0	0	0	0	0	0	1
thirty-one	seventy-two	1	0	RU	27.8	30.2	1	1	1	1	1	1	0	1	0	1	0	1	0	0	0	0	0	208	0	12	7.17	4	9.23	36.92	0	0	0	60	0	0	40	0	0	0	1	0	0	0
thirty-two	fifty-nine	0	1	RU	27.5	36.3	1	1	1	1	1	0	0	1	0	0	1	1	0	0	0	0	0	157	0	0	12.67	8.28	5.56	46.0368	0	0	0	20	60	0	20	0	0	0	0	1	0	0
thirty-three	sixty-eight	0	0	LU	29.4	53.3	1	1	0	1	0	1	0	0	0	1	0	1	0	0	0	0	0	164	1	0	10.37	6.01	3.63	21.8163	0	0	0	65	5	0	30	0	0	0	1	0	0	0
thirty-four	sixty-five	1	1	RM	11.1	25.2	1	1	0	1	0	0	0	0	0	1	0	1	0	0	0	0	0	200	0	0	6.15	3.64	0.74	2.6936	0	0	0	50	50	0	0	0	0	0	0	1	0	0
thirty-five	seventy-four	1	1	LL	27.1	36.9	1	1	1	1	0	0	0	0	0	0	1	1	0	0	0	0	0	140	0	11	11.76	7.73	5.5	42.515	0	0	0	50	50	0	0	0	0	0	0	1	0	0
thirty-six	seventy	1	0	RU	12.8	23.8	0	0	0	1	1	0	0	0	0	1	0	1	1	0	0	0	0	227	0	0	1.34	0.89	1.55	1.3795	0	0	0	100	0	0	0	0	0	0	1	0	0	0
thirty-seven	fifty-seven	0	1	LU	12.1	9	1	1	0	1	0	0	0	0	0	1	0	1	0	0	0	0	0	157	0	0	0.77	0.57	0.1	0.057	0	0	0	100	0	0	0	0	0	0	1	0	0	0
thirty-eight	sixty-four	0	1	LU	20	17.4	1	1	0	1	0	0	0	1	0	1	0	1	0	0	0	0	0	110	0	0	12.92	8.7	1.77	15.399	0	0	0	0	0	80	20	0	0	0	0	0	0	1
thirty-nine	seventy-five	1	0	RL	13.7	18.3	0	0	0	1	0	0	0	0	0	1	0	1	0	0	0	0	0	142	0	0	2.46	1.25	0.7	0.875	0	0	0	30	0	60	10	0	0	0	0	0	0	1
forty	seventy-two	0	0	LU	23.7	30.5	1	1	0	1	1	1	0	1	0	0	1	1	1	0	0	0	0	178	1	5,7,10	7.03	4.28	2.98	12.7544	0	0	0	10	40	20	30	0	0	0	0	1	0	0
forty-one	fifty-six	0	0	LU	17.9	26.1	1	1	0	0	1	1	0	0	0	1	0	1	1	0	0	0	0	164	0	0	7.08	4.38	1.37	6.0006	0	0	0	100	0	0	0	0	0	0	1	0	0	0
forty-two	sixty-nine	0	1	RU	9.2	19.1	1	1	0	1	0	0	0	0	0	1	0	1	0	0	0	0	1	157	0	0	6.24	4.36	0.44	1.9184	0	0	0	100	0	0	0	0	0	0	1	0	0	0
forty-three	sixty-three	0	0	RU	30.9	39.4	1	1	0	1	1	0	1	1	0	0	1	1	0	0	0	0	0	175	0	0	6.18	3.59	4.8	17.232	0	0	10	25	5	0	60	0	0	0	0	0	1	0
forty-four	fifty-seven	0	1	LU	13	10.8	1	0	0	0	0	0	0	0	0	1	0	1	0	1	0	0	1	209	0	0	2.32	1.41	0.52	0.7332	0	0	0	80	0	20	0	0	0	0	1	0	0	0
forty-five	sixty-one	1	0	RL	11.2	14.2	0	1	0	1	1	0	0	0	0	1	0	1	1	0	0	0	0	169	0	0	1.84	1.15	0.26	0.299	0	0	0	100	0	0	0	0	0	0	1	0	0	0
forty-six	sixty-four	0	1	RU	22.7	26.2	1	1	0	1	0	1	0	0	0	1	0	1	0	0	0	0	0	130	0	0	6.1	3.84	1.28	4.9152	0	0	0	100	0	0	0	0	0	0	1	0	0	0
forty-seven	fifty-nine	0	0	RL	27.8	32.3	1	0	1	0	0	1	0	0	0	1	0	1	0	0	0	0	0	154	0	0	2.72	1.54	0.71	1.0934	0	0	0	80	20	0	0	0	0	0	1	0	0	0
forty-eight	fifty-six	0	1	LU	26.5	34.1	1	1	0	1	1	1	0	1	0	0	1	1	1	0	0	1	0	181	0	0	11.47	7.87	3.94	31.0078	0	0	0	10	0	0	90	0	0	0	0	0	1	0
forty-nine	sixty-eight	1	1	RU	13.5	28.5	1	1	0	1	1	1	0	1	0	0	1	1	1	0	0	0	0	167	0	0	8.86	6.34	0.53	3.3602	0	0	0	30	55	0	5	0	0	0	0	1	0	0
fifty	sixty-eight	1	1	RL	23.4	41.5	1	1	0	1	0	1	0	0	0	1	0	1	1	0	0	0	0	167	0	10	5.59	3.48	3.65	12.702	0	0	0	0	0	80	20	0	0	0	0	0	0	1
fifty-one	sixty-three	1	1	LU	20	23.9	1	1	0	1	0	0	0	0	0	1	0	1	0	1	1	0	0	155	0	11	7.4	4.75	2.93	13.9175	0	0	0	0	30	70	0	0	0	0	0	0	0	1
fifty-two	fifty-three	1	1	RU	22.2	21	1	1	0	1	1	1	0	1	0	0	1	1	0	0	0	0	0	150	0	11	5.93	3.77	1.85	6.9745	0	0	0	20	20	0	30	0	0	0	0	0	0	1
fifty-three	fifty-six	1	0	LL	21	20.5	1	1	0	1	0	0	0	0	0	1	0	1	0	0	1	0	0	167	1	0	7.29	4.64	1.73	8.0272	0	0	0	70	30	0	0	0	0	0	1	0	0	0
fifty-four	fifty-six	0	0	RU	27.8	27.3	1	1	1	0	1	0	0	0	0	0	1	1	0	0	0	0	0	179	1	0	10.46	7.19	4.39	31.5641	0	0	0	90	0	0	10	0	0	0	1	0	0	0
fifty-five	seventy-two	1	0	RL	17	21.8	0	1	1	1	1	0	0	0	0	1	0	1	0	0	0	0	0	199	1	0	6.8	4.77	0.37	1.7649	0	0	0	40	0	0	60	0	0	0	0	0	1	0
fifty-six	fifty-eight	1	0	RM	27.3	37.2	1	1	0	1	1	1	0	0	0	0	1	1	1	0	1	0	0	234	1	0	22.06	14.05	2.48	34.844	0	0	0	100	0	0	0	0	0	0	1	0	0	0
fifty-seven	fifty-four	0	1	RU	22.5	32.6	1	1	0	0	1	1	0	0	0	1	0	1	0	0	0	0	0	152	0	0	7.86	4.8	2.01	9.648	0	0	0	70	10	20	0	0	0	0	1	0	0	0
fifty-eight	fifty-nine	0	1	RU	26.6	32	1	1	0	1	1	1	0	1	0	1	0	1	1	0	0	0	0	163	0	0	8.79	5.37	5.5	29.535	0	0	0	90	10	0	0	0	0	0	1	0	0	0
fifty-nine	seventy-eight	0	1	LU	43.8	35	1	0	1	1	1	0	0	0	0	0	1	1	1	0	1	0	1	89	1	0	10.26	6.45	6.63	42.7635	0	0	0	40	60	0	0	0	0	0	0	1	0	0
sixty	forty-two	0	1	LM	22.3	20	1	0	1	0	1	0	0	0	0	0	1	1	0	0	0	0	0	96	0	0	8.2	6.33	1.26	7.9758	0	0	0	0	100	0	0	0	0	0	0	1	0	0
sixty-one	fifty-seven	1	0	RU	20.3	39	1	1	1	0	1	0	0	0	0	1	0	1	0	0	0	0	0	68	1	0	2.56	1.66	1.33	2.2078	0	0	0	40	0	40	20	0	0	0	0	0	0	1
sixty-two	sixty-seven	0	1	LL	13.7	16.5	1	0	0	1	0	0	0	0	0	0	1	1	0	0	0	0	0	76	0	0	2.64	2.09	0.02	0.0418	0	0	0	30	0	0	70	0	0	0	0	0	0	1
sixty-three	fifty-seven	0	1	RU	26.7	37.3	1	1	0	1	1	1	0	0	0	0	1	1	0	0	0	0	0	94	0	4,11	4.6	3	2.72	8.16	0	0	0	30	10	0	60	0	0	0	0	0	1	0
sixty-four	forty-seven	1	0	LU	18.1	20	1	0	1	0	0	0	0	0	0	1	0	1	0	0	0	0	0	90	0	0	4.17	3.22	0.89	2.8658	0	0	0	90	10	0	0	0	0	0	1	0	0	0
sixty-five	fifty-five	1	0	LL	22.5	34.7	0	0	0	1	1	0	0	0	0	1	0	1	1	0	0	0	0	119	1	0	9	5.15	4.14	21.321	0	0	0	60	0	40	0	0	0	0	1	0	0	0
sixty-six	fifty-nine	0	0	RU	45.9	42	1	1	1	1	1	0	0	0	0	1	0	1	0	0	0	0	0	86	0	0	23.34	16.78	16.08	269.822	0	0	0	90	10	90	10	0	0	0	1	0	0	0
sixty-seven	sixty-four	1	0	LL	30.4	34.9	1	1	0	1	1	0	1	0	0	0	1	1	1	0	0	0	0	95	0	5,7,10,11	8.34	5.18	8.84	45.7912	0	0	0	40	0	20	40	0	0	0	0	0	1	0
sixty-eight	fifty-one	1	0	RL	13.3	20.2	1	1	0	1	1	0	0	0	0	1	0	1	0	0	0	0	1	54	0	0	2.02	1.65	1.52	2.508	0	0	20	80	0	0	0	0	0	0	1	0	0	0
sixty-nine	fifty-one	1	0	RL	19.9	26.1	1	1	0	0	1	0	1	0	0	1	0	1	0	0	0	0	0	98	0	3,7,8,9,10	8.17	5.62	1.38	7.7556	0	0	0	80	0	0	20	0	0	0	1	0	0	0
seventy	seventy-four	0	1	RU	30	33	1	1	0	1	1	1	0	0	0	1	0	1	1	0	0	0	0	93	1	0	10.73	6.67	9.72	64.8324	0	0	0	80	0	0	20	0	0	0	1	0	0	0
seventy-one	sixty-four	1	0	RL	37.5	35	0	1	1	1	1	0	1	0	0	0	1	1	1	0	0	0	0	122	0	2,4,7,10	7.15	4.53	12.89	58.3917	0	0	0	30	0	0	70	0	0	0	0	0	1	0
seventy-two	sixty-four	1	0	LU	23.4	31.1	1	1	0	1	1	0	0	0	0	1	0	1	1	0	0	0	0	96	0	0	8.32	5.4	3.48	18.792	0	0	0	50	30	0	20	0	0	0	1	0	0	0
seventy-three	sixty-five	0	0	RL	31.2	21.4	1	0	1	0	1	0	0	0	0	1	0	1	0	1	0	0	0	54	1	0	5.68	3.61	3.76	13.5736	0	0	0	80	0	0	20	0	0	0	1	0	0	0
seventy-four	fifty-four	0	0	RU	37.1	41	1	0	1	1	1	0	0	0	0	1	0	1	1	1	1	0	0	88	1	0	12.31	6.5	5.71	37.115	0	0	0	60	40	0	0	0	0	0	1	0	0	0
seventy-five	fifty-seven	1	1	RL	49.3	9	0	0	0	0	1	1	0	0	0	1	0	1	0	0	0	0	0	101	0	0	3.75	3.07	0.42	1.2894	0	0	0	80	0	20	0	0	0	0	1	0	0	0
seventy-six	sixty-six	0	1	RL	18.2	25	0	0	1	0	1	0	0	0	0	0	1	1	0	0	0	0	0	109	0	10,11,12	5.3	3.59	0.88	3.1592	0	0	0	0	30	0	70	0	0	0	0	0	1	0
seventy-seven	sixty-seven	1	0	RU	33.3	22	1	0	0	1	0	0	0	0	0	1	0	1	0	0	0	0	0	96	0	0	8.44	4.95	8.64	42.768	0	0	0	50	5	20	25	0	0	0	1	0	0	0
seventy-eight	sixty-seven	1	1	LU	27	36	0	0	1	0	1	0	1	0	0	0	1	1	1	1	1	0	0	49	1	7,11,12	15.48	6.95	8.16	56.712	0	0	0	10	0	0	90	0	0	0	0	0	1	0
seventy-nine	fifty-six	0	0	RM	24.7	37	1	0	0	1	1	0	1	0	0	1	0	1	0	0	0	0	0	83	1	7,10,11,12	4.4	2.58	1.82	4.6956	0	0	0	60	0	30	10	0	0	0	1	0	0	0
eighty	fifty-two	1	1	LU	22.2	23	1	1	0	1	1	0	0	0	0	1	0	1	1	0	0	1	0	129	0	0	6.85	3.85	6.42	24.717	0	0	0	60	0	0	40	0	0	0	1	0	0	0
eighty-one	sixty-one	1	0	LU	27.4	20	1	0	0	1	0	0	0	0	0	1	0	1	0	0	0	0	0	70	0	0	8.42	4.23	2.16	9.1368	0	0	0	90	0	0	10	0	0	0	1	0	0	0
eighty-two	fifty-eight	0	1	RU	55.4	39	0	0	1	0	0	0	0	0	0	0	1	1	1	1	1	0	0	87	1	0	10.39	7.26	59.76	433.858	0	0	0	0	100	0	0	0	0	0	0	1	0	0
eighty-three	sixty-two	0	0	RL	89.9	23	0	0	1	0	1	1	0	0	0	1	0	1	1	0	1	0	0	38	0	0	6.95	4.26	37.72	160.687	0	0	0	70	0	0	30	0	0	0	1	0	0	0
eighty-four	forty-one	1	0	LL	17.6	37	1	0	0	1	0	0	0	0	0	1	0	1	0	0	0	0	0	51	1	0	1.42	1.34	0.01	0.0134	0	0	0	0	5	90	5	0	0	0	0	0	0	1
eighty-five	fifty-four	1	0	RU	24.4	43	1	0	0	1	0	0	0	0	0	1	0	1	0	0	0	0	0	73	1	0	6.54	4	4.61	18.44	0	0	0	70	0	20	10	0	0	0	1	0	0	0
eighty-six	sixty-one	0	0	LU	20.2	33	0	1	0	1	1	0	0	0	0	0	1	1	0	0	0	0	0	98	0	0	9.54	6.07	2.04	12.3828	0	0	0	10	20	0	70	0	0	0	0	0	1	0
eighty-seven	forty-eight	1	0	LL	11.5	23	1	0	0	0	0	0	0	0	0	1	0	1	0	0	0	0	0	50	0	0	1.7	1.7	0.05	0.085	0	0	0	100	0	0	0	0	0	0	1	0	0	0
eighty-eight	forty-nine	1	0	LU	18.2	27	1	1	0	1	0	0	0	0	0	1	0	1	0	0	0	0	0	81	0	0	10.55	6.15	2.08	12.792	0	0	0	75	25	0	0	0	0	0	1	0	0	0
